# Supplementary material
Source: publisher site journal article supplement (https://www.spandidos-publications.com/7792/downloadSupplementary)
Supplement: Supplementary file 1 [file downloadSupplementary]

## Sheet: Table SI
Table SI. Multiple reaction monitoring parameters for liquid chromatography-mass spectrometry analysis of amino acids and biogenic amines.
Database identifier	Chemical formula	Smiles	InChI	Metabolite identification	Metabolite class	Modifications	Charge	Retention time	Q1 (m/z)	Q3 (m/z)	Declustering potential (V)	Entrance potential (V)	Collision energy (V)	Collision cell exit potential (V)
HMDB0000562	C₄H₇N₃O	CN1C(=O)N=C(N)C1	InChI=1S/C4H7N3O/c1-7-2-3(5)6-4(7)8/h2H2,1H3,(H3,5,6,8)	Creatinine		PTC	[M+H]+	0.93	114.1	44.1	60	10	17	15
				d3-Creatinine	Internal standard	PTC	[M+H]+	0.92	117.1	47.1	60	10	17	15
HMDB:HMDB0000123	C2H5NO2	NCC(O)=O	InChI=1S/C2H5NO2/c3-1-2(4)5/h1,3H2,(H,4,5)	Gly	Amino acids	PTC	[M+H]+	3.59	211.2	75.9	66	10	14	15
				13C2-15N-Gly	Internal standard	PTC	[M+H]+	3.59	214.2	78.9	66	10	14	15
HMDB:HMDB0000161;HMDB:HMDB0001310	C3H7NO2	CC(N)C(O)=O;C[C@@H](N)C(O)=O;C[C@H](N)C(O)=O;[2H]C([2H])([2H])[C@]([2H])(N)C(O)=O;	InChI=1S/C3H7NO2/c1-2(4)3(5)6/h2H,4H2,1H3,(H,5,6);InChI=1S/C3H7NO2/c1-2(4)3(5)6/h2H,4H2,1H3,(H,5,6)/t2-/m0/s1;InChI=1S/C3H7NO2/c1-2(4)3(5)6/h2H,4H2,1H3,(H,5,6)/t2-/m0/s1/i1D3,2D;InChI=1S/C3H7NO2/c1-2(4)3(5)6/h2H,4H2,1H3,(H,5,6)/t2-/m1/s1	Ala	Amino acids	PTC	[M+H]+	3.9	225.2	44.2	61	10	35	15
				d4-Ala	Internal standard	PTC	[M+H]+	3.89	229.2	48.2	61	10	35	15
HMDB:HMDB0000187;HMDB:HMDB0003406	C3H7NO3	NC(CO)C(O)=O;N[C@@H](CO)C(O)=O;N[C@H](CO)C(O)=O	InChI=1S/C3H7NO3/c4-2(1-5)3(6)7/h2,5H,1,4H2,(H,6,7);InChI=1S/C3H7NO3/c4-2(1-5)3(6)7/h2,5H,1,4H2,(H,6,7)/t2-/m0/s1;InChI=1S/C3H7NO3/c4-2(1-5)3(6)7/h2,5H,1,4H2,(H,6,7)/t2-/m1/s1	Ser	Amino acids	PTC	[M+H]+	3.47	241.2	60	140	10	31	15
				d3-Ser	Internal standard	PTC	[M+H]+	3.47	244.2	63	140	10	31	15
HMDB:HMDB0000870	C5H9N3	NCCC1=CNC=N1	InChI=1S/C5H9N3/c6-2-1-5-3-7-4-8-5/h3-4H,1-2,6H2,(H,7,8)	Histamine	Imidazole alkaloids	PTC	[M+H]+	2.98	247	154	140	10	19	15
HMDB:HMDB0000162;HMDB:HMDB0003411	C5H9NO2	OC(=O)C1CCCN1;OC(=O)[C@@H]1CCCN1;OC(=O)[C@H]1CCCN1	InChI=1S/C5H9NO2/c7-5(8)4-2-1-3-6-4/h4,6H,1-3H2,(H,7,8);InChI=1S/C5H9NO2/c7-5(8)4-2-1-3-6-4/h4,6H,1-3H2,(H,7,8)/t4-/m0/s1;InChI=1S/C5H9NO2/c7-5(8)4-2-1-3-6-4/h4,6H,1-3H2,(H,7,8)/t4-/m1/s1	Pro	Amino acids	PTC	[M+H]+	3.86	251.2	70.3	140	10	43	15
HMDB:HMDB0000883	C5H11NO2	CC(C)C(N)C(O)=O;CC(C)[C@@H](N)C(O)=O;CC(C)[C@H](N)C(O)=O;O=[13C](O)[13C@@H]([15NH2])[13CH]([13CH3])[13CH3];	InChI=1S/C5H11NO2/c1-3(2)4(6)5(7)8/h3-4H,6H2,1-2H3,(H,7,8);InChI=1S/C5H11NO2/c1-3(2)4(6)5(7)8/h3-4H,6H2,1-2H3,(H,7,8)/t4-/m0/s1;InChI=1S/C5H11NO2/c1-3(2)4(6)5(7)8/h3-4H,6H2,1-2H3,(H,7,8)/t4-/m0/s1/i1+1,2+1,3+1,4+1,5+1,6+1;InChI=1S/C5H11NO2/c1-3(2)4(6)5(7)8/h3-4H,6H2,1-2H3,(H,7,8)/t4-/m1/s1	Val	Amino acids	PTC	[M+H]+	4.43	253.2	72.2	81	10	31	15
HMDB:HMDB0000167;HMDB:HMDB0004041	C4H9NO3	CC(O)C(N)C(O)=O;C[C@@H](O)[C@H](N)C(O)=O;C[C@H](O)[C@H](N)C(O)=O	InChI=1S/C4H9NO3/c1-2(6)3(5)4(7)8/h2-3,6H,5H2,1H3,(H,7,8);InChI=1S/C4H9NO3/c1-2(6)3(5)4(7)8/h2-3,6H,5H2,1H3,(H,7,8)/t2-,3+/m1/s1;InChI=1S/C4H9NO3/c1-2(6)3(5)4(7)8/h2-3,6H,5H2,1H3,(H,7,8)/t2-,3-/m0/s1	Thr	Amino acids	PTC	[M+H]+	3.68	255.2	74.1	66	10	29	15
HMDB:HMDB0012275	C18H37NO2	NCCC1=CC=CC=C1	InChI=1S/C8H11N/c9-7-6-8-4-2-1-3-5-8/h1-5H,6-7,9H2	PEA	NAE	PTC	[M+H]+	5.27	257.2	105.2	71	10	31	15
				d7-Pro	Internal standard	PTC	[M+H]+	3.84	258.2	77.3	140	10	43	15
				13C4-15N-Thr	Internal standard	PTC	[M+H]+	3.68	259.2	77.1	66	10	29	15
HMDB:HMDB0000251	C2H7NO3S	NCCS(O)(=O)=O	InChI=1S/C2H7NO3S/c3-1-2-7(4,5)6/h1-3H2,(H,4,5,6)	Taurine	Sulfonic acids	PTC	[M+H]+	3.04	261	126.1	71	10	21	15
				d8-Val	Internal standard	PTC	[M+H]+	4.42	261.2	80.2	81	10	31	15
				13C2-Taurine	Internal standard	PTC	[M+H]+	3.04	263	128	61	10	21	15
HMDB:HMDB0240251	C5H9NO3	O[C@@H]1CN[C@@H](C1)C(O)=O;O[C@H]1CN[C@H](C1)C(O)=O;	InChI=1S/C5H9NO3/c7-3-1-4(5(8)9)6-2-3/h3-4,6-7H,1-2H2,(H,8,9)/t3-,4-/m0/s1;InChI=1S/C5H9NO3/c7-3-1-4(5(8)9)6-2-3/h3-4,6-7H,1-2H2,(H,8,9)/t3-,4-/m1/s1	c4-OH-Pro	Amino acids	PTC	[M+H]+	3.42	267.1	68	140	10	61	15
HMDB:HMDB0000725	C5H9NO3	OC1CNC(C1)C(O)=O;O[C@H]1CN[C@@H](C1)C(O)=O;	InChI=1S/C5H9NO3/c7-3-1-4(5(8)9)6-2-3/h3-4,6-7H,1-2H2,(H,8,9);InChI=1S/C5H9NO3/c7-3-1-4(5(8)9)6-2-3/h3-4,6-7H,1-2H2,(H,8,9)/t3-,4+/m1/s1	t4-OH-Pro	Amino acids	PTC	[M+H]+	3.28	267.15	68	140	10	61	15
HMDB:HMDB0000687;HMDB:HMDB0013773	C6H13NO2	CC(C)CC(N)C(O)=O;CC(C)C[C@@H](N)C(O)=O;CC(C)C[C@H](N)C(O)=O	InChI=1S/C6H13NO2/c1-4(2)3-5(7)6(8)9/h4-5H,3,7H2,1-2H3,(H,8,9);InChI=1S/C6H13NO2/c1-4(2)3-5(7)6(8)9/h4-5H,3,7H2,1-2H3,(H,8,9)/t5-/m0/s1;InChI=1S/C6H13NO2/c1-4(2)3-5(7)6(8)9/h4-5H,3,7H2,1-2H3,(H,8,9)/t5-/m1/s1	Leu	Amino acids	PTC	[M+H]+	4.68	267.3	43	140	10	66	15
HMDB:HMDB0000172;HMDB:HMDB0000557	C6H13NO2	CCC(C)C(N)C(O)=O;CC[C@@H](C)[C@H](N)C(O)=O;CC[C@H](C)[C@H](N)C(O)=O	InChI=1S/C6H13NO2/c1-3-4(2)5(7)6(8)9/h4-5H,3,7H2,1-2H3,(H,8,9);InChI=1S/C6H13NO2/c1-3-4(2)5(7)6(8)9/h4-5H,3,7H2,1-2H3,(H,8,9)/t4-,5+/m1/s1;InChI=1S/C6H13NO2/c1-3-4(2)5(7)6(8)9/h4-5H,3,7H2,1-2H3,(H,8,9)/t4-,5-/m0/s1	Ile	Amino acids	PTC	[M+H]+	4.7	267.3	69	140	10	45	15
HMDB:HMDB0000168;HMDB:HMDB0033780	C4H8N2O3	NC(CC(N)=O)C(O)=O;N[C@@H](CC(N)=O)C(O)=O;N[C@H](CC(N)=O)C(O)=O	InChI=1S/C4H8N2O3/c5-2(4(8)9)1-3(6)7/h2H,1,5H2,(H2,6,7)(H,8,9);InChI=1S/C4H8N2O3/c5-2(4(8)9)1-3(6)7/h2H,1,5H2,(H2,6,7)(H,8,9)/t2-/m0/s1;InChI=1S/C4H8N2O3/c5-2(4(8)9)1-3(6)7/h2H,1,5H2,(H2,6,7)(H,8,9)/t2-/m1/s1	Asn	Amino acids	PTC	[M+H]+	3.33	268.2	87	140	10	25	15
HMDB:HMDB0000191;HMDB:HMDB0006483	C4H7NO4	NC(CC(O)=O)C(O)=O;N[C@@H](CC(O)=O)C(O)=O;N[C@H](CC(O)=O)C(O)=O	InChI=1S/C4H7NO4/c5-2(4(8)9)1-3(6)7/h2H,1,5H2,(H,6,7)(H,8,9);InChI=1S/C4H7NO4/c5-2(4(8)9)1-3(6)7/h2H,1,5H2,(H,6,7)(H,8,9)/t2-/m0/s1;InChI=1S/C4H7NO4/c5-2(4(8)9)1-3(6)7/h2H,1,5H2,(H,6,7)(H,8,9)/t2-/m1/s1	Asp	Amino acids	PTC	[M+H]+	3.59	269.2	116.2	76	10	21	15
				15N2-Asn	Internal standard	PTC	[M+H]+	3.33	270.2	89.2	66	10	27	15
				d3-Asp	Internal standard	PTC	[M+H]+	3.58	272.2	119.2	76	10	21	15
				13C6-Ile	Internal standard	PTC	[M+H]+	4.7	273.2	91.2	66	10	27	15
HMDB:HMDB0000641;HMDB:HMDB0003423	C5H10N2O3	NC(CCC(N)=O)C(O)=O;N[C@@H](CCC(N)=O)C(O)=O;N[C@H](CCC(N)=O)C(O)=O	InChI=1S/C5H10N2O3/c6-3(5(9)10)1-2-4(7)8/h3H,1-2,6H2,(H2,7,8)(H,9,10);InChI=1S/C5H10N2O3/c6-3(5(9)10)1-2-4(7)8/h3H,1-2,6H2,(H2,7,8)(H,9,10)/t3-/m0/s1;InChI=1S/C5H10N2O3/c6-3(5(9)10)1-2-4(7)8/h3H,1-2,6H2,(H2,7,8)(H,9,10)/t3-/m1/s1	Gln	Internal standard	PTC	[M+H]+	3.32	282.2	130	71	10	25	15
HMDB:HMDB0000148;HMDB:HMDB0003339	C5H9NO4	NC(CCC(O)=O)C(O)=O;N[C@@H](CCC(O)=O)C(O)=O;N[C@H](CCC(O)=O)C(O)=O	InChI=1S/C5H9NO4/c6-3(5(9)10)1-2-4(7)8/h3H,1-2,6H2,(H,7,8)(H,9,10);InChI=1S/C5H9NO4/c6-3(5(9)10)1-2-4(7)8/h3H,1-2,6H2,(H,7,8)(H,9,10)/t3-/m0/s1;InChI=1S/C5H9NO4/c6-3(5(9)10)1-2-4(7)8/h3H,1-2,6H2,(H,7,8)(H,9,10)/t3-/m1/s1	Glu	Amino acids	PTC	[M+H]+	3.56	283.2	130.2	76	10	23	15
HMDB:HMDB0000696	C5H11NO2S	CSCCC(N)C(O)=O;CSCC[C@@H](N)C(O)=O;CSCC[C@H](N)C(O)=O	InChI=1S/C5H11NO2S/c1-9-3-2-4(6)5(7)8/h4H,2-3,6H2,1H3,(H,7,8);InChI=1S/C5H11NO2S/c1-9-3-2-4(6)5(7)8/h4H,2-3,6H2,1H3,(H,7,8)/t4-/m0/s1;InChI=1S/C5H11NO2S/c1-9-3-2-4(6)5(7)8/h4H,2-3,6H2,1H3,(H,7,8)/t4-/m1/s1	Met	Amino acids	PTC	[M+H]+	4.36	285.1	104.2	71	10	25	15
				d3-Glu	Internal standard	PTC	[M+H]+	3.56	286.2	133.2	76	10	23	15
				d5-Gln	Internal standard	PTC	[M+H]+	3.32	287.2	135	71	10	25	15
				d3-Met	Internal standard	PTC	[M+H]+	4.35	288.1	107.2	71	10	25	15
HMDB:HMDB0000073	C8H11NO2	NCCC1=CC(O)=C(O)C=C1	InChI=1S/C8H11NO2/c9-4-3-6-1-2-7(10)8(11)5-6/h1-2,5,10-11H,3-4,9H2	Dopamine	Phenylethylamines	PTC	[M+H]+	4.12	289.2	137.2	140	10	29	15
HMDB:HMDB0000177	C6H9N3O2	NC(Cc1c[nH]cn1)C(O)=O;N[C@@H](CC1=CN=CN1)C(O)=O;N[C@H](Cc1c[nH]cn1)C(O)=O	InChI=1S/C6H9N3O2/c7-5(6(10)11)1-4-2-8-3-9-4/h2-3,5H,1,7H2,(H,8,9)(H,10,11);InChI=1S/C6H9N3O2/c7-5(6(10)11)1-4-2-8-3-9-4/h2-3,5H,1,7H2,(H,8,9)(H,10,11)/t5-/m0/s1;InChI=1S/C6H9N3O2/c7-5(6(10)11)1-4-2-8-3-9-4/h2-3,5H,1,7H2,(H,8,9)(H,10,11)/t5-/m1/s1	His	Amino acids	PTC	[M+H]+	2.95	291.1	110.2	140	10	33	15
				d4-Dopamine	Internal standard	PTC	[M+H]+	4.12	293.1	141.1	140	10	29	15
				13C6-His	Internal standard	PTC	[M+H]+	2.95	297.1	115.2	140	10	33	15
HMDB:HMDB0000510	C6H11NO4	NC(CCCC(O)=O)C(O)=O;N[C@@H](CCCC(O)=O)C(O)=O;N[C@H](CCCC(O)=O)C(O)=O	InChI=1S/C6H11NO4/c7-4(6(10)11)2-1-3-5(8)9/h4H,1-3,7H2,(H,8,9)(H,10,11);InChI=1S/C6H11NO4/c7-4(6(10)11)2-1-3-5(8)9/h4H,1-3,7H2,(H,8,9)(H,10,11)/t4-/m0/s1;InChI=1S/C6H11NO4/c7-4(6(10)11)2-1-3-5(8)9/h4H,1-3,7H2,(H,8,9)(H,10,11)/t4-/m1/s1	alpha-AAA	Amino acids	PTC	[M+H]+	3.69	297.1	144.2	140	10	23	15
HMDB:HMDB0000159	C9H11NO2	NC(Cc1ccccc1)C(O)=O;N[C@@H](CC1=CC=CC=C1)C(O)=O;N[C@H](Cc1ccccc1)C(O)=O	InChI=1S/C9H11NO2/c10-8(9(11)12)6-7-4-2-1-3-5-7/h1-5,8H,6,10H2,(H,11,12);InChI=1S/C9H11NO2/c10-8(9(11)12)6-7-4-2-1-3-5-7/h1-5,8H,6,10H2,(H,11,12)/t8-/m0/s1;InChI=1S/C9H11NO2/c10-8(9(11)12)6-7-4-2-1-3-5-7/h1-5,8H,6,10H2,(H,11,12)/t8-/m1/s1	Phe	Amino acids	PTC	[M+H]+	4.72	301.2	120.2	71	10	31	15
HMDB:HMDB0002005	C5H11NO3S	CS(=O)CC[C@@H](N)C(O)=O;CS(=O)CC[C@H](N)C(O)=O;C[S@@](=O)CC[C@H](N)C(O)=O;C[S@](=O)CC[C@H](N)C(O)=O;	InChI=1S/C5H11NO3S/c1-10(9)3-2-4(6)5(7)8/h4H,2-3,6H2,1H3,(H,7,8)/t4-,10+/m0/s1;InChI=1S/C5H11NO3S/c1-10(9)3-2-4(6)5(7)8/h4H,2-3,6H2,1H3,(H,7,8)/t4-,10-/m0/s1;InChI=1S/C5H11NO3S/c1-10(9)3-2-4(6)5(7)8/h4H,2-3,6H2,1H3,(H,7,8)/t4-,10?/m0/s1;InChI=1S/C5H11NO3S/c1-10(9)3-2-4(6)5(7)8/h4H,2-3,6H2,1H3,(H,7,8)/t4-,10?/m1/s1	Met-SO	Amino acids	PTC	[M+H]+	3.39	301.2	88.1	61	10	41	15
				d5-Phe	Internal standard	PTC	[M+H]+	4.71	306.2	125.2	71	10	31	15
HMDB:HMDB0000517;HMDB:HMDB0003416	C6H14N4O2	NC(CCCNC(N)=N)C(O)=O;N[C@@H](CCCNC(N)=N)C(O)=O;N[C@H](CCCNC(N)=N)C(O)=O	InChI=1S/C6H14N4O2/c7-4(5(11)12)2-1-3-10-6(8)9/h4H,1-3,7H2,(H,11,12)(H4,8,9,10);InChI=1S/C6H14N4O2/c7-4(5(11)12)2-1-3-10-6(8)9/h4H,1-3,7H2,(H,11,12)(H4,8,9,10)/t4-/m0/s1;InChI=1S/C6H14N4O2/c7-4(5(11)12)2-1-3-10-6(8)9/h4H,1-3,7H2,(H,11,12)(H4,8,9,10)/t4-/m1/s1	Arg	Amino acids	PTC	[M+H]+	3.07	310	217	76	10	23	15
HMDB:HMDB0003357	C7H14N2O3	CC(=O)NCCC[C@H](N)C(O)=O;CC(=O)N[C@@H](CCCN)C(O)=O;OC(=O)[C@H](CCCN[*])N[*]	InChI=1S/C7H14N2O3/c1-5(10)9-4-2-3-6(8)7(11)12/h6H,2-4,8H2,1H3,(H,9,10)(H,11,12)/t6-/m0/s1;InChI=1S/C7H14N2O3/c1-5(10)9-6(7(11)12)3-2-4-8/h6H,2-4,8H2,1H3,(H,9,10)(H,11,12)/t6-/m0/s1	Ac-Orn	Amino acids	PTC	[M+H]+	3.5	310.2	217.3	140	10	15	15
HMDB:HMDB0000904	C6H8O7	NC(CCCNC(N)=O)C(O)=O;N[C@@H](CCCNC(N)=O)C(O)=O;N[C@H](CCCNC(N)=O)C(O)=O	InChI=1S/C6H13N3O3/c7-4(5(10)11)2-1-3-9-6(8)12/h4H,1-3,7H2,(H,10,11)(H3,8,9,12);InChI=1S/C6H13N3O3/c7-4(5(10)11)2-1-3-9-6(8)12/h4H,1-3,7H2,(H,10,11)(H3,8,9,12)/t4-/m0/s1;InChI=1S/C6H13N3O3/c7-4(5(10)11)2-1-3-9-6(8)12/h4H,1-3,7H2,(H,10,11)(H3,8,9,12)/t4-/m1/s1	Cit	TCA acids	PTC	[M+H]+	3.37	311.2	113.1	140	10	29	15
				15N2-Arg	Internal standard	PTC	[M+H]+	3.07	312	219	76	10	23	15
HMDB:HMDB0000259	C10H12N2O	NCCC1=CNC2=CC=C(O)C=C12	InChI=1S/C10H12N2O/c11-4-3-7-6-12-10-2-1-8(13)5-9(7)10/h1-2,5-6,12-13H,3-4,11H2	Serotonin	Tryptamines	PTC	[M+H]+	4.26	312.3	160.2	66	10	27	15
				13C-d4-Cit	Internal standard	PTC	[M+H]+	3.37	316.1	118.2	140	10	29	15
				d4-Serotonin	Internal standard	PTC	[M+H]+	4.26	316.3	164.2	66	10	27	15
HMDB:HMDB0000158	C9H11NO3	NC(Cc1ccc(O)cc1)C(O)=O;N[C@@H](CC1=CC=C(O)C=C1)C(O)=O;N[C@H](Cc1ccc(O)cc1)C(O)=O	InChI=1S/C9H11NO3/c10-8(9(12)13)5-6-1-3-7(11)4-2-6/h1-4,8,11H,5,10H2,(H,12,13);InChI=1S/C9H11NO3/c10-8(9(12)13)5-6-1-3-7(11)4-2-6/h1-4,8,11H,5,10H2,(H,12,13)/t8-/m0/s1;InChI=1S/C9H11NO3/c10-8(9(12)13)5-6-1-3-7(11)4-2-6/h1-4,8,11H,5,10H2,(H,12,13)/t8-/m1/s1	Tyr	Amino acids	PTC	[M+H]+	4.07	317.2	136.1	76	10	31	15
				d4-Tyr	Internal standard	PTC	[M+H]+	4.07	321.2	140.1	76	10	31	15
HMDB:HMDB0000181;HMDB:HMDB0000609	C9H11NO4	NC(CC1=CC=C(O)C(O)=C1)C(O)=O;N[C@@H](CC1=CC(O)=C(O)C=C1)C(O)=O;N[C@H](Cc1ccc(O)c(O)c1)C(O)=O	InChI=1S/C9H11NO4/c10-6(9(13)14)3-5-1-2-7(11)8(12)4-5/h1-2,4,6,11-12H,3,10H2,(H,13,14);InChI=1S/C9H11NO4/c10-6(9(13)14)3-5-1-2-7(11)8(12)4-5/h1-2,4,6,11-12H,3,10H2,(H,13,14)/t6-/m0/s1;InChI=1S/C9H11NO4/c10-6(9(13)14)3-5-1-2-7(11)8(12)4-5/h1-2,4,6,11-12H,3,10H2,(H,13,14)/t6-/m1/s1	DOPA	Amino acids	PTC	[M+H]+	3.81	333.1	198.1	61	10	19	15
				d3-DOPA	Internal standard	PTC	[M+H]+	3.81	336.1	201.1	140	10	19	15
HMDB:HMDB0001539	C8H18N4O2	CN\C(NCCC[C@H](N)C(O)=O)=N\C;N[C@@H](CCC\N=C(/N)N(C)C)C(O)=O;	InChI=1S/C8H18N4O2/c1-10-8(11-2)12-5-3-4-6(9)7(13)14/h6H,3-5,9H2,1-2H3,(H,13,14)(H2,10,11,12)/t6-/m0/s1;InChI=1S/C8H18N4O2/c1-12(2)8(10)11-5-3-4-6(9)7(13)14/h6H,3-5,9H2,1-2H3,(H2,10,11)(H,13,14)/t6-/m0/s1	ADMA	Amino acids	PTC	[M+H]+	3.19	338.2	46	71	10	61	15
				total DMA	Amino acids	PTC	[M+H]+	3.21	338.2	70.1	71	10	61	15
HMDB:HMDB0003334	C8H18N4O2	CN\C(NCCC[C@H](N)C(O)=O)=N/C	InChI=1S/C8H18N4O2/c1-10-8(11-2)12-5-3-4-6(9)7(13)14/h6H,3-5,9H2,1-2H3,(H,13,14)(H2,10,11,12)/t6-/m0/s1	SDMA	Amino acids	PTC	[M+H]+	3.21	338.2	307	81	10	17	15
HMDB:HMDB0000929;HMDB:HMDB0013609	C11H12N2O2	NC(Cc1c[nH]c2ccccc12)C(O)=O;N[C@@H](CC1=CNC2=C1C=CC=C2)C(O)=O;N[C@H](CC1=CNC2=C1C=CC=C2)C(O)=O	InChI=1S/C11H12N2O2/c12-9(11(14)15)5-7-6-13-10-4-2-1-3-8(7)10/h1-4,6,9,13H,5,12H2,(H,14,15);InChI=1S/C11H12N2O2/c12-9(11(14)15)5-7-6-13-10-4-2-1-3-8(7)10/h1-4,6,9,13H,5,12H2,(H,14,15)/t9-/m0/s1;InChI=1S/C11H12N2O2/c12-9(11(14)15)5-7-6-13-10-4-2-1-3-8(7)10/h1-4,6,9,13H,5,12H2,(H,14,15)/t9-/m1/s1	Trp	Amino acids	PTC	[M+H]+	4.59	340.2	188.2	96	10	25	15
				15N2-Trp	Internal standard	PTC	[M+H]+	4.59	342.2	189.2	96	10	25	15
HMDB:HMDB0000684	C10H12N2O3	NC(CC(=O)c1ccccc1N)C(O)=O;N[C@@H](CC(=O)C1=CC=CC=C1N)C(O)=O;N[C@H](CC(=O)c1ccccc1N)C(O)=O	InChI=1S/C10H12N2O3/c11-7-4-2-1-3-6(7)9(13)5-8(12)10(14)15/h1-4,8H,5,11-12H2,(H,14,15);InChI=1S/C10H12N2O3/c11-7-4-2-1-3-6(7)9(13)5-8(12)10(14)15/h1-4,8H,5,11-12H2,(H,14,15)/t8-/m0/s1;InChI=1S/C10H12N2O3/c11-7-4-2-1-3-6(7)9(13)5-8(12)10(14)15/h1-4,8H,5,11-12H2,(H,14,15)/t8-/m1/s1	Kynurenine	Amino acids	PTC	[M+H]+	4.56	344.2	146.2	140	10	33	15
				d7-ADMA	Internal standard	PTC	[M+H]+	3.18	345.2	77.2	71	10	61	15
HMDB:HMDB0001414	C4H12N2	NCCCCN	InChI=1S/C4H12N2/c5-3-1-2-4-6/h1-6H2	Putrescine	Monoalkylamines	PTC	[M+H]+	4.76	359.2	266.1	140	10	19	15
HMDB:HMDB0000033	C9H14N4O3	NCCC(=O)N[C@@H](CC1=CN=CN1)C(O)=O	InChI=1S/C9H14N4O3/c10-2-1-8(14)13-7(9(15)16)3-6-4-11-5-12-6/h4-5,7H,1-3,10H2,(H,11,12)(H,13,14)(H,15,16)/t7-/m0/s1	Carnosine	Dipeptides	PTC	[M+H]+	2.92	362.2	110.1	140	10	47	15
HMDB:HMDB0001904	C9H10N2O5	NC(Cc1ccc(O)c(c1)[N+]([O-])=O)C(O)=O;NC(Cc1ccc(O)cc1[N+]([O-])=O)C(O)=O;N[C@@H](CC1=CC=C(O)C(=C1)[N+]([O-])=O)C(O)=O	InChI=1S/C9H10N2O5/c10-6(9(13)14)3-5-1-2-8(12)7(4-5)11(15)16/h1-2,4,6,12H,3,10H2,(H,13,14);InChI=1S/C9H10N2O5/c10-6(9(13)14)3-5-1-2-8(12)7(4-5)11(15)16/h1-2,4,6,12H,3,10H2,(H,13,14)/t6-/m0/s1;InChI=1S/C9H10N2O5/c10-7(9(13)14)3-5-1-2-6(12)4-8(5)11(15)16/h1-2,4,7,12H,3,10H2,(H,13,14)	Nitro-Tyr	Amino acids	PTC	[M+H]+	4.59	362.2	136.1	65	10	41	15
				d4-Putrescine	Internal standard	PTC	[M+H]+	4.76	363.2	270.1	140	10	19	15
HMDB:HMDB0000214;HMDB:HMDB0003374	C5H12N2O2	NCCCC(N)C(O)=O;NCCC[C@@H](N)C(O)=O;NCCC[C@H](N)C(O)=O	InChI=1S/C5H12N2O2/c6-3-1-2-4(7)5(8)9/h4H,1-3,6-7H2,(H,8,9);InChI=1S/C5H12N2O2/c6-3-1-2-4(7)5(8)9/h4H,1-3,6-7H2,(H,8,9)/t4-/m0/s1;InChI=1S/C5H12N2O2/c6-3-1-2-4(7)5(8)9/h4H,1-3,6-7H2,(H,8,9)/t4-/m1/s1	Orn	Amino acids	PTC	[M+H]+	4.46	403.2	310.2	76	10	19	15
				d6-Orn	Internal standard	PTC	[M+H]+	4.45	409.2	316.2	76	10	19	15
HMDB:HMDB0000182;HMDB:HMDB0003405	C6H14N2O2	NCCCCC(N)C(O)=O;NCCCC[C@@H](N)C(O)=O;NCCCC[C@H](N)C(O)=O	InChI=1S/C6H14N2O2/c7-4-2-1-3-5(8)6(9)10/h5H,1-4,7-8H2,(H,9,10);InChI=1S/C6H14N2O2/c7-4-2-1-3-5(8)6(9)10/h5H,1-4,7-8H2,(H,9,10)/t5-/m0/s1;InChI=1S/C6H14N2O2/c7-4-2-1-3-5(8)6(9)10/h5H,1-4,7-8H2,(H,9,10)/t5-/m1/s1	Lys	Amino acids	PTC	[M+H]+	4.57	417.2	324.2	81	10	19	15
HMDB:HMDB0001257	C7H19N3	NCCCCNCCCN	InChI=1S/C7H19N3/c8-4-1-2-6-10-7-3-5-9/h10H,1-9H2	Spermidine	Polyamines	PTC	[M+H]+	5.25	551.2	193.2	71	10	41	15
HMDB:HMDB0001256	C10H26N4	NCCCNCCCCNCCCN	InChI=1S/C10H26N4/c11-5-3-9-13-7-1-2-8-14-10-4-6-12/h13-14H,1-12H2	Spermine	Polyamines	PTC	[M+H]+	5.54	743.3	193.2	140	10	61	15
				d8-Spermidine	Internal standard	PTC	[M+H]+	5.24	559.2	193.2	71	10	41	15
				d8-Spermine	Internal standard	PTC	[M+H]+	5.54	751.3	193.2	140	10	61	15
HMDB, Human Metabolome Database; InChI, International Chemical Identifier; PTC, papillary thyroid cancer.
